# Supplementary material for: Sewage Reflects the Microbiomes of Human Populations
Source: PubMed Central journal article supplement — mBio. 2015 Feb 24;6(2):e02574-14. doi: 10.1128/mBio.02574-14 (PMC4358014; doi:10.1128/mbio.02574-14), 2015-02-24
Supplement: mbo001152182st3.pdf [file mbo001152182st3.pdf]

Table S3. PCoA environmental and demographic variable correlation coefficients

| Factors <sup>1</sup>                  | Human Fecal Oligotypes   |        |         |       | Non-Fecal Oligotypes     |         |         |         |
|---------------------------------------|--------------------------|--------|---------|-------|--------------------------|---------|---------|---------|
|                                       | All Samples <sup>2</sup> | August | January | May   | All Samples <sup>1</sup> | August  | January | May     |
| Sample Period                         | 0.09***                  | n/a    | n/a     | n/a   | 0.13***                  | n/a     | n/a     | n/a     |
| Temperature Profile <sup>3</sup>      | 0.04*                    | 0.07   | 0.08    | 0.02  | 0.39***                  | 0.29*** | 0.36*** | 0.52*** |
| Longitude                             | 0.02                     | 0.01   | 0.05    | 0.03  | 0.04*                    | 0.01    | 0.06    | 0.17*   |
| Sample Type                           | 0.03*                    | 0.03   | 0.01    | 0.04  | 0.03*                    | 0.01    | 0.01    | 0.05    |
| Sewer System                          | 0.03*                    | 0.02   | 0.04    | 0.04  | 0.06***                  | 0.06**  | 0.05*   | 0.11**  |
| Population Size                       | 0.01                     | 0.03   | 0.00    | 0.02  | 0.00                     | 0.01    | 0.00    | 0.00    |
| Obesity %                             | 0.06**                   | 0.06   | 0.08    | 0.11* | 0.02                     | 0.02    | 0.02    | 0.06    |
| Median Age                            | 0.03*                    | 0.09*  | 0.01    | 0.04  | 0.00                     | 0.00    | 0.03    | 0.00    |
| Biological Oxygen Demand <sup>4</sup> | 0.00                     | n/a    | n/a     | n/a   | 0.05*                    | n/a     | n/a     | n/a     |
| Daily Average Flow                    | 0.03                     | n/a    | n/a     | n/a   | 0.00                     | n/a     | n/a     | n/a     |
| Total Nitrogen                        | 0.05                     | n/a    | n/a     | n/a   | 0.03                     | n/a     | n/a     | n/a     |
| Total Phosphorus                      | 0.02                     | n/a    | n/a     | n/a   | 0.04                     | n/a     | n/a     | n/a     |
| Total Suspended Solids                | 0.04                     | n/a    | n/a     | n/a   | 0.01                     | n/a     | n/a     | n/a     |

1. Significance level \*\*\* p<0.001, \*\* p<0.01, \*p<0.05

2. All sample periods were included together for this analysis.

3. The temperature profile of a city was calculated from the previous 30-year average high and low temperatures for each of the three sewage collection days for a city. See SI Materials and Methods for details.

4. Some samples do not include measurements for the environmental variables beginning with Biological oxygen demand. Correlation analyses were conducted separately for each environmental variable with missing data so that only those samples with measurements for that variable were included. The total number of samples (out of 207 total) included in each analysis was Biological oxygen demand – 124, Daily average flow – 179, Total nitrogen – 78, Total phosphorus – 80, and Total suspended solids – 159.
